# Supplementary material for: Using electronic admission data to monitor temporal trends in local medication use: Experience from an Australian tertiary teaching hospital
Source: PubMed Central journal article supplement (PMC9614045; doi:10.3389/fphar.2022.888677), 2022-10-14
Supplement: Image1.pdf [file Image1.pdf]

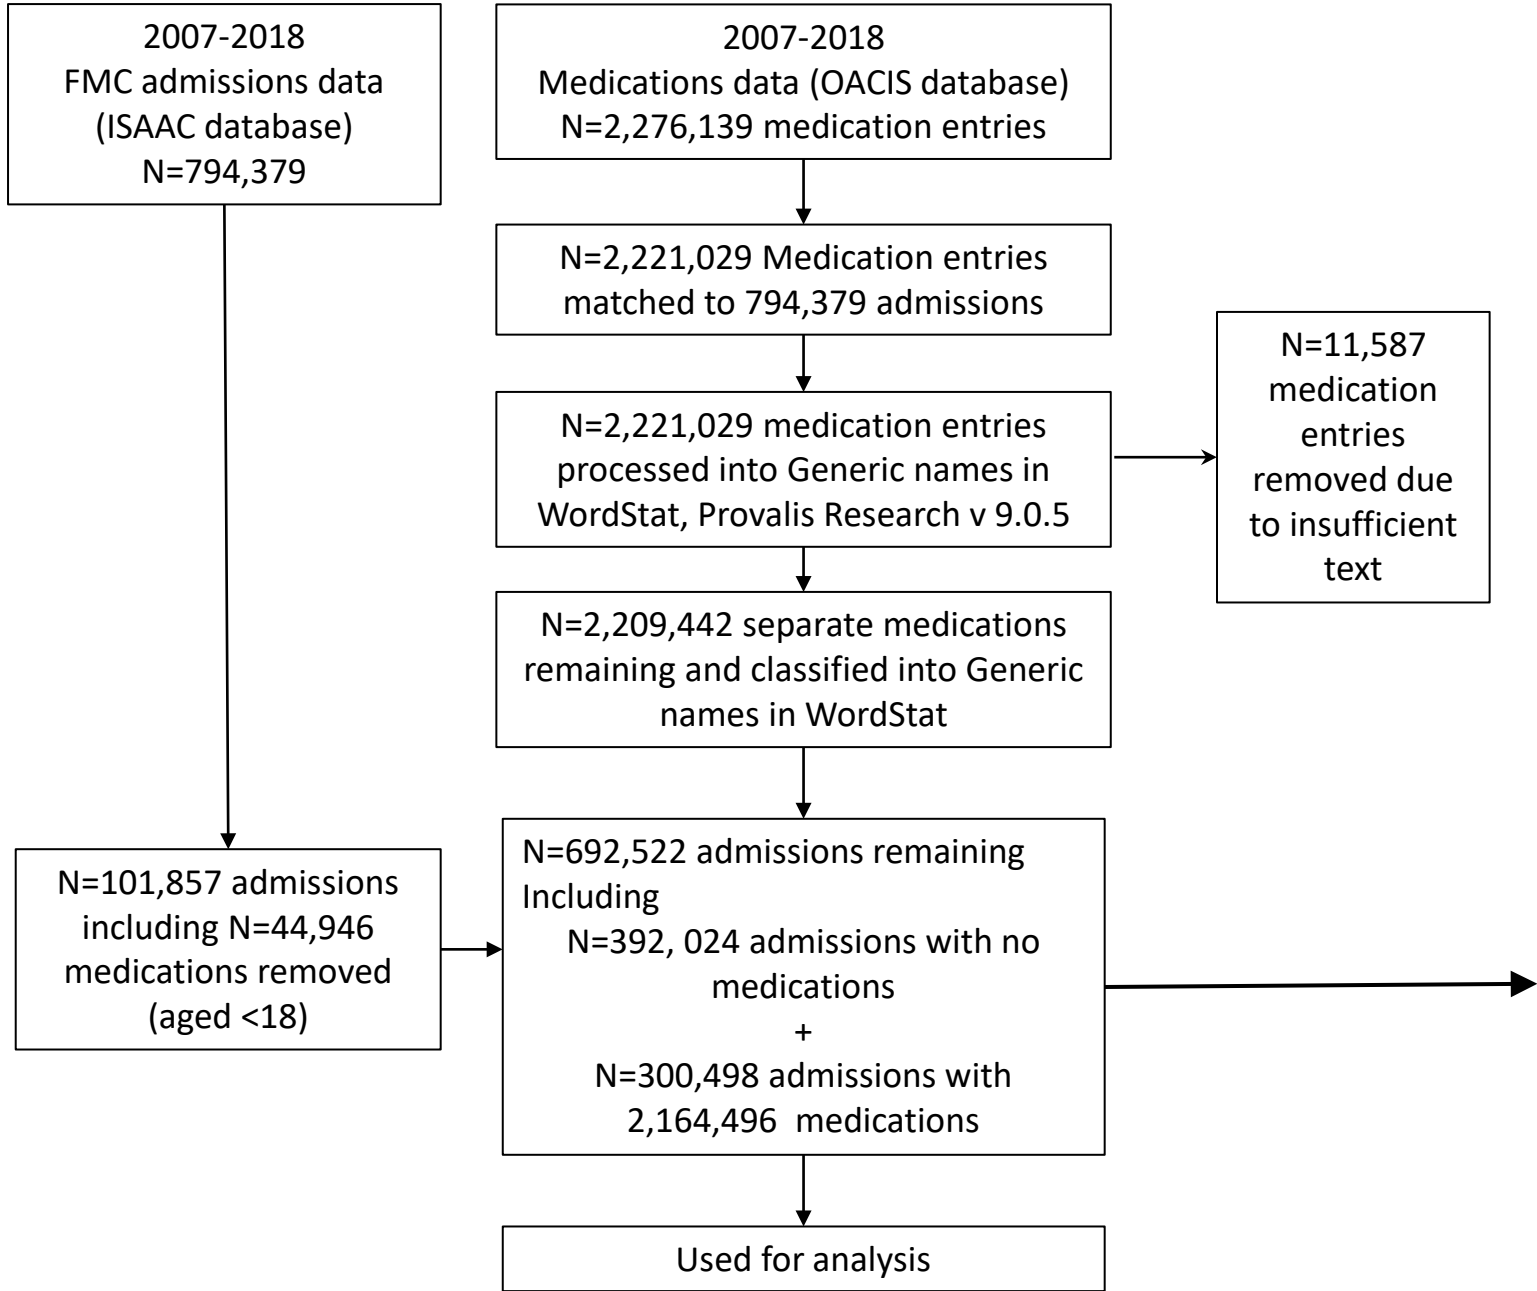

| Drug Class                                 | N                | %             |
|--------------------------------------------|------------------|---------------|
| Other                                      | 860,331          | 39.75         |
| Antithrombotic agents                      | 151,585          | 7.00          |
| Obstructive airways disease drugs          | 119,124          | 5.50          |
| PPIs                                       | 118,465          | 5.47          |
| Opioids                                    | 105,909          | 4.89          |
| Renin-angiotensin system agents            | 102,035          | 4.71          |
| Statins                                    | 98,907           | 4.57          |
| Beta-blocking agents                       | 84,979           | 3.93          |
| Antidepressants                            | 84,688           | 3.91          |
| Diabetes                                   | 80,025           | 3.70          |
| Diuretics                                  | 80,025           | 3.66          |
| Psychotropics                              | 78,471           | 3.63          |
| Antiepileptics                             | 50,314           | 2.32          |
| Calcium channel blockers                   | 49,849           | 2.30          |
| Vasodilators                               | 37,273           | 1.72          |
| Anti-inflammatory and antirheumatic agents | 19,334           | 0.89          |
| Cardiac glycosides                         | 13,192           | 0.61          |
| Antihypertensives                          | 10,776           | 0.50          |
| Antiarrhythmics                            | 9,168            | 0.42          |
| Anti-Parkinson drugs                       | 7,784            | 0.36          |
| Corticosteroids                            | 1,875            | 0.09          |
| Anti-dementia drugs                        | 1,166            | 0.05          |
| <b>Total</b>                               | <b>2,164,496</b> | <b>100.00</b> |
